# Supplementary material for: Long-Term Burden of Increased Body Mass Index from Childhood on Adult Dyslipidemia: The i3C Consortium Study
Source: MDPI journal article supplement (doi:10.3390/jcm8101725), 2019-10-18
Supplement: s1 [file s1]

# 1 Supplemental Materials

## 2 Study Cohorts

### 3 *The Bogalusa Heart Study*

4 The Bogalusa Heart Study (BHS), a series of long-term observations in a semi-rural biracial (65%  
5 white and 35% black) community in Bogalusa, Louisiana, was founded by Dr. Gerald Berenson in  
6 1973. It is focused on understanding the early natural history of cardiovascular disease and childhood  
7 risk factors. In the community of Bogalusa, Louisiana, 9 surveys of children aged 4-18 years and 11  
8 surveys of adults aged 19-51 years who were previously examined as children were conducted  
9 between 1973 and 2010. The last survey was conducted in 2007-10, with recruitment of 914 adult  
10 participants aged 36-52 years.

### 11 *The Cardiovascular Risk in Young Finns Study*

12 The Cardiovascular Risk in Young Finns Study (YFS) is a population-based multicenter study in  
13 Finland and the largest European CV risk factor follow-up study from childhood to adulthood.  
14 Participants aged 3-18 years (N=3596) were recruited in 1980, and this cohort has been followed-up  
15 every 3-6 years. The most recent in person examination was in 2011 with participation of 2041  
16 individuals (62% of the 3318 invited).

### 17 *The Muscatine Study*

18 The Muscatine Study (MUSC) was initiated in 1970 in the schools of Muscatine, Iowa.  
19 Approximately 70% of the eligible school population (11,377 students, 5-18 years at baseline) had  
20 data collected over the following 12 years. During 1982-91, a representative subset of 2547 (age 20-  
21 39) was re-examined, and a subsample of those (n=906) was followed longitudinally between 1992-  
22 2008.

### 23 *The NHLBI Growth and Health Study*

24 The NHLBI Growth and Health Study (NGHS) was started in 1987 as a longitudinal fixed-cohort  
25 study of girls (9-10 years at baseline and followed annually for 10 years to age 19) at three clinical  
26 centers (Richmond, CA, Cincinnati, OH, and Washington, DC). Only the Cincinnati center (N=870) is  
27 participating in the i3C Consortium. Yearly examinations were conducted between ages 19-24, and  
28 there were two visits between ages 25-29. The last in-person examination was conducted between  
29 2003-06, with recruitment of 535 participants.

### 30 *The Prevention of High BP in Children Study*

31 The Prevention of High BP in Children study (PHBPC) was initiated in 1977-78 with BP  
32 screening of 10,423 6-8 year olds. A cohort of 1207 was selected for long-term evaluation, with  
33 stratification for race. They were seen twice yearly through grade school, once yearly through high  
34 school, and at ages 19 and 23. At age 39, 81% of a limited group of 480 individuals with children were  
35 found for a comprehensive anthropometric and metabolic screening.  
36

**Table S1.** Characteristics of included and excluded participants.

|                               | Included<br>(N=5195) | Excluded<br>(N=4535) | P      |
|-------------------------------|----------------------|----------------------|--------|
| Male, n (%)                   | 2069 (39.8)          | 2170 (47.9)          | <0.001 |
| White, n (%)                  | 4212 (80.1)          | 3703 (81.7)          | <0.001 |
| <b>Childhood (First exam)</b> |                      |                      |        |
| Age (yr)                      | 10.1 (3.3)           | 11.6 (4.4)           | <0.001 |
| BMI (kg/m <sup>2</sup> )      | 17.7 (3.2)           | 18.8 (3.9)           | <0.001 |
| <b>Adulthood (Last exam)</b>  |                      |                      |        |
| Age (yr)                      | 34.1 (6.8)           | 29.8 (8.4)           | <0.001 |
| BMI (kg/m <sup>2</sup> )      | 28.0 (6.7)           | 26 (6.1)             | <0.001 |
| LDL-C (mg/dL) <sup>a</sup>    | 120.6 (33.2)         | 114.7 (33.1)         | <0.001 |
| HDL-C (mg/dL) <sup>a</sup>    | 49.9 (13.7)          | 49.8 (13.7)          | 0.690  |
| TG (mg/dL) <sup>a, b</sup>    | 116.2 (74.6)         | 106.9 (75.7)         | <0.001 |
| High LDL-C, n (%)             | 776 (14.9)           | 420 (9.3)            | <0.001 |
| Low HDL-C, n (%)              | 1355 (26.1)          | 1074 (23.7)          | 0.006  |
| High TG, n (%)                | 719 (13.8)           | 401 (8.8)            | <0.001 |
| Dyslipidemia, n (%)           | 1916 (36.7)          | 1445 (31.9)          | <0.001 |

38 Values are mean (SD) and n (%). BMI=body mass index; LDL-C=low-density lipoprotein cholesterol;  
 39 HDL-C=high-density lipoprotein cholesterol; TG=triglycerides; a, Participants who were on  
 40 medication were excluded; b, Non-fasting samples were excluded.

41

**Table S2.** Characteristics of participants by race and sex.

| Study variable                            | White            |                    | Black           |                   | P for race difference |        |
|-------------------------------------------|------------------|--------------------|-----------------|-------------------|-----------------------|--------|
|                                           | Male<br>(n=1796) | Female<br>(n=2416) | Male<br>(n=273) | Female<br>(n=710) | Male                  | Female |
| <b>Childhood (First exam)</b>             |                  |                    |                 |                   |                       |        |
| Age (yr)                                  | 10.2 (3.4)       | 10.1 (3.2)         | 10.0 (2.9)      | 9.8 (2.1)         | 0.540                 | 0.001  |
| BMI (kg/m <sup>2</sup> )                  | 17.8 (3.1)       | 17.6 (3.1)         | 17.3 (3.2)      | 18.0 (3.7)*       | 0.054                 | 0.011  |
| <b>Adulthood (Last exam)</b>              |                  |                    |                 |                   |                       |        |
| Age (yr)                                  | 39.5 (6.1)       | 37.9 (7.3)*        | 38.4 (7.0)      | 32.7 (7.8)*       | 0.021                 | <0.001 |
| BMI (kg/m <sup>2</sup> )                  | 28.1 (5.3)       | 26.8 (6.5)*        | 29.3 (7.5)      | 31.1 (8.5)*       | 0.010                 | <0.001 |
| LDL-C (mg/dL) <sup>a</sup>                | 129.6 (33.3)     | 117.0 (31.3)*      | 119.6 (35.2)    | 110.4 (32.5)*     | <0.001                | <0.001 |
| HDL-C (mg/dL) <sup>a</sup>                | 44.5 (11.1)      | 53.5 (13.6)*       | 50.0 (17.7)     | 51.4 (14.3)       | <0.001                | 0.002  |
| TG (mg/dL) <sup>a, b</sup>                | 139.5 (90.7)     | 105.8 (59.8)*      | 126.2 (89.1)    | 89.0 (45.8)*      | 0.023                 | <0.001 |
| High LDL-C, n (%)                         | 397 (22.1)       | 268 (11.1)*        | 45 (16.5)       | 70 (9.5)*         | 0.035                 | 0.173  |
| Low HDL-C, n (%)                          | 739 (41.2)       | 394 (16.3)*        | 84 (30.8)       | 138 (19.4)*       | <0.001                | 0.051  |
| High TG, n (%)                            | 395 (22.0)       | 242 (10.0)*        | 44 (16.1)       | 38 (5.4)*         | 0.027                 | <0.001 |
| Dyslipidemia, n (%)                       | 976 (54.3)       | 637 (26.4)*        | 121 (44.3)      | 182 (25.6)*       | 0.002                 | 0.697  |
| <b>AUC measures</b>                       |                  |                    |                 |                   |                       |        |
| Average age (yr)                          | 23.2 (5.5)       | 22.6 (5.3)*        | 21.1 (4.8)      | 19.4 (3.9)*       | <0.001                | <0.001 |
| BMI AUC <sub>t</sub> (kg/m <sup>2</sup> ) | 24.1 (3.9)       | 23.2 (4.3)*        | 24.6 (5.0)      | 26.0 (6.0)*       | 0.161                 | <0.001 |
| BMI AUC <sub>i</sub> (kg/m <sup>2</sup> ) | 6.4 (2.7)        | 5.6 (3.3)*         | 7.2 (3.5)       | 7.9 (4.3)*        | <0.001                | <0.001 |

42 Values are mean (SD) and n (%). BMI=body mass index; LDL-C=low-density lipoprotein cholesterol;  
 43 HDL-C=high-density lipoprotein cholesterol; TG=triglycerides; AUC<sub>t</sub>=total area under the curve;  
 44 AUC<sub>i</sub>=incremental area under the curve; a, Participants who were on medication were excluded; b,  
 45 Nonfasting samples were excluded. \* P<0.01 for sex difference within racial groups.

46 **Table S3.** Standardized odds ratios (ORs) and 95% confidence intervals (CIs) of BMI measures for  
 47 adult dyslipidemia by race and sex.

| Independent Variable | White |        | Black |        | P for race difference |        |
|----------------------|-------|--------|-------|--------|-----------------------|--------|
|                      | Male  | Female | Male  | Female | Male                  | Female |

| <b>Dependent Variable: Dyslipidemia</b> |                  |                   |                  |                  |       |       |
|-----------------------------------------|------------------|-------------------|------------------|------------------|-------|-------|
| Childhood BMI <sup>a</sup>              | 1.09 (0.99-1.21) | 1.36 (1.24-1.49)* | 1.26 (1.01-1.58) | 1.25 (1.09-1.42) | 0.157 | 0.439 |
| Adulthood BMI                           | 2.27 (1.97-2.62) | 2.01 (1.83-2.22)  | 1.76 (1.39-2.23) | 1.61 (1.41-1.83) | 0.098 | 0.003 |
| BMI AUC <sub>t</sub> <sup>b</sup>       | 1.66 (1.46-1.88) | 1.84 (1.67-2.02)  | 1.61 (1.27-2.05) | 1.46 (1.29-1.65) | 0.831 | 0.003 |
| BMI AUC <sub>i</sub> <sup>c</sup>       | 1.95 (1.71-2.24) | 1.66 (1.51-1.82)  | 1.61 (1.26-2.06) | 1.41 (1.24-1.61) | 0.607 | 0.030 |
| <b>Dependent Variable: High LDL-C</b>   |                  |                   |                  |                  |       |       |
| Childhood BMI <sup>a</sup>              | 1.01 (0.90-1.14) | 1.23 (1.08-1.39)* | 1.13 (0.86-1.47) | 1.12 (0.91-1.36) | 0.455 | 0.867 |
| Adulthood BMI                           | 1.55 (1.35-1.78) | 1.46 (1.31-1.64)  | 1.46 (1.13-1.89) | 1.28 (1.07-1.53) | 0.800 | 0.197 |
| BMI AUC <sub>t</sub> <sup>b</sup>       | 1.30 (1.14-1.48) | 1.38 (1.23-1.55)  | 1.42 (1.10-1.83) | 1.20 (1.01-1.43) | 0.546 | 0.211 |
| BMI AUC <sub>i</sub> <sup>c</sup>       | 1.46 (1.28-1.67) | 1.29 (1.15-1.44)  | 1.46 (1.11-1.92) | 1.14 (0.95-1.37) | 0.988 | 0.157 |
| <b>Dependent Variable: Low HDL-C</b>    |                  |                   |                  |                  |       |       |
| Childhood BMI <sup>a</sup>              | 1.15 (1.04-1.28) | 1.50 (1.36-1.67)* | 1.33 (1.06-1.67) | 1.33 (1.15-1.53) | 0.177 | 0.162 |
| Adulthood BMI                           | 2.01 (1.76-2.30) | 2.02 (1.82-2.24)  | 1.86 (1.46-2.37) | 1.76 (1.53-2.03) | 0.556 | 0.092 |
| BMI AUC <sub>t</sub> <sup>b</sup>       | 1.64 (1.46-1.86) | 1.98 (1.78-2.20)* | 1.74 (1.36-2.22) | 1.60 (1.40-1.83) | 0.679 | 0.015 |
| BMI AUC <sub>i</sub> <sup>c</sup>       | 1.80 (1.59-2.05) | 1.74 (1.57-1.93)  | 1.71 (1.32-2.20) | 1.55 (1.35-1.78) | 0.620 | 0.242 |
| <b>Dependent Variable: High TG</b>      |                  |                   |                  |                  |       |       |
| Childhood BMI <sup>a</sup>              | 1.15 (1.03-1.29) | 1.12 (0.98-1.28)  | 1.25 (0.97-1.62) | 1.10 (0.85-1.43) | 0.488 | 0.901 |
| Adulthood BMI                           | 2.17 (1.87-2.5)  | 1.70 (1.51-1.91)* | 1.39 (1.07-1.82) | 1.25 (0.99-1.58) | 0.005 | 0.011 |
| BMI AUC <sub>t</sub> <sup>b</sup>       | 1.71 (1.50-1.95) | 1.53 (1.36-1.72)  | 1.42 (1.10-1.85) | 1.29 (1.04-1.61) | 0.247 | 0.269 |
| BMI AUC <sub>i</sub> <sup>c</sup>       | 1.83 (1.59-2.11) | 1.55 (1.38-1.73)  | 1.30 (0.98-1.72) | 1.31 (1.06-1.64) | 0.089 | 0.251 |

48 BMI=body mass index; LDL-C=low-density lipoprotein cholesterol; HDL-C=high-density lipoprotein  
49 cholesterol; TG=triglycerides; AUC<sub>t</sub>=total area under the curve; AUC<sub>i</sub>=incremental area under the  
50 curve. ORs of the four BMI measures were estimated in separate models. Covariates included adult  
51 age and cohort; a, adjusted for childhood age prior to regression analyses; b, adjusted for average  
52 age prior to regression analyses; c, adjusted for average age and childhood BMI prior to regression  
53 analyses; \* P<0.05 for sex difference within racial groups.

54 **Table S4.** Standardized odds ratios (ORs) and 95% confidence intervals (CIs) of BMI measures for  
55 adult dyslipidemia by adult age groups.

| <b>Adult age groups</b> | Prevalence of dyslipidemia (%) | <b>Independent variable</b> |                  |                                   |                                   |
|-------------------------|--------------------------------|-----------------------------|------------------|-----------------------------------|-----------------------------------|
|                         |                                | Childhood BMI <sup>a</sup>  | Adulthood BMI    | BMI AUC <sub>t</sub> <sup>b</sup> | BMI AUC <sub>i</sub> <sup>c</sup> |
| ≤30 yr (n=1159)         | 27.8                           | 1.34 (1.08-1.66)            | 1.70 (1.38-2.11) | 1.59 (1.29-1.96)                  | 1.47 (1.15-1.87)                  |
| 31-35 yr (n=716)        | 33.1                           | 1.41 (1.07-1.86)            | 2.06 (1.6-2.64)  | 1.92 (1.49-2.49)                  | 1.76 (1.39-2.23)                  |
| 36-40 yr (n=1480)       | 37.6                           | 1.14 (0.97-1.33)            | 1.79 (1.54-2.09) | 1.55 (1.34-1.80)                  | 1.51 (1.31-1.74)                  |
| 41-45 yr (n=1066)       | 41.9                           | 1.11 (0.96-1.30)            | 1.67 (1.43-1.96) | 1.46 (1.25-1.70)                  | 1.59 (1.35-1.87)                  |
| ≥46 yr (n=774)          | 46.6                           | 1.03 (0.89-1.18)            | 1.61 (1.36-1.91) | 1.39 (1.18-1.63)                  | 1.55 (1.30-1.85)                  |

56 BMI=body mass index; LDL-C=low-density lipoprotein cholesterol; HDL-C=high-density lipoprotein  
57 cholesterol; TG=triglycerides; AUC<sub>t</sub>=total area under the curve; AUC<sub>i</sub>=incremental area under the  
58 curve; Dyslipidemia was defined as any of high LDL-C, low HDL-C or high TG. Covariates included

59 adult age, race, sex and cohort. ORs of the four BMI measures were estimated in separate models; a,  
 60 adjusted for childhood age prior to regression analyses; b, adjusted for average age prior to regression  
 61 analyses; c, adjusted for average age and childhood BMI prior to regression analyses.

62 **Table S5.** Standardized odds ratios (ORs) and 95% confidence intervals (CIs) of BMI burden for adult  
 63 dyslipidemia with and without adjusting for the last adult BMI.

| Independent variable | Dependent Variable  |                     |                     |                     |
|----------------------|---------------------|---------------------|---------------------|---------------------|
|                      | Dyslipidemia        | High LDL-C          | Low HDL-C           | High TG             |
| Model 1:             |                     |                     |                     |                     |
| BMI burden           | 1.57 (1.47-1.67) ** | 1.27 (1.18-1.37) ** | 1.67 (1.56-1.78) ** | 1.43 (1.33-1.55) ** |
| Model 2:             |                     |                     |                     |                     |
| Last BMI             | 1.85 (1.74-1.97) ** | 1.42 (1.32-1.53) ** | 1.82 (1.71-1.95) ** | 1.65 (1.53-1.77) ** |
| Model 3:             |                     |                     |                     |                     |
| BMI burden           | 0.73 (0.65-0.82) ** | 0.78 (0.68-0.90) ** | 0.88 (0.79-0.99) *  | 0.77 (0.66-0.89) ** |
| Last adult BMI       | 2.60 (2.31-2.93) ** | 1.79 (1.56-2.05) ** | 2.20 (1.95-2.49) ** | 2.16 (1.86-2.50) ** |

64 \* P<0.05, \*\* P<0.01 for OR being significantly different from 1. BMI=body mass index; LDL-C=low-  
 65 density lipoprotein cholesterol; HDL-C=high-density lipoprotein cholesterol; TG=triglycerides.  
 66 Dyslipidemia was defined as any of high LDL-C, low HDL-C or high TG. Covariates included adult  
 67 age, race, sex and cohort. BMI burden was calculated as the mean of regression residuals of BMI at all  
 68 the age-points before the last adult BMI measurement.

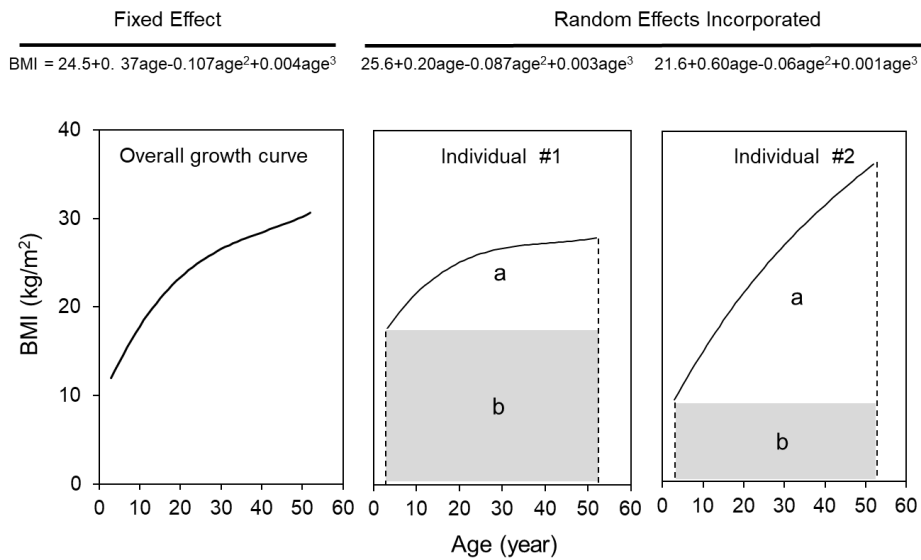

**Supplemental Figure 1.** The area under the curve (AUC) of body mass index (BMI)  
 a = incremental AUC; b = baseline AUC; a+b = total AUC

69

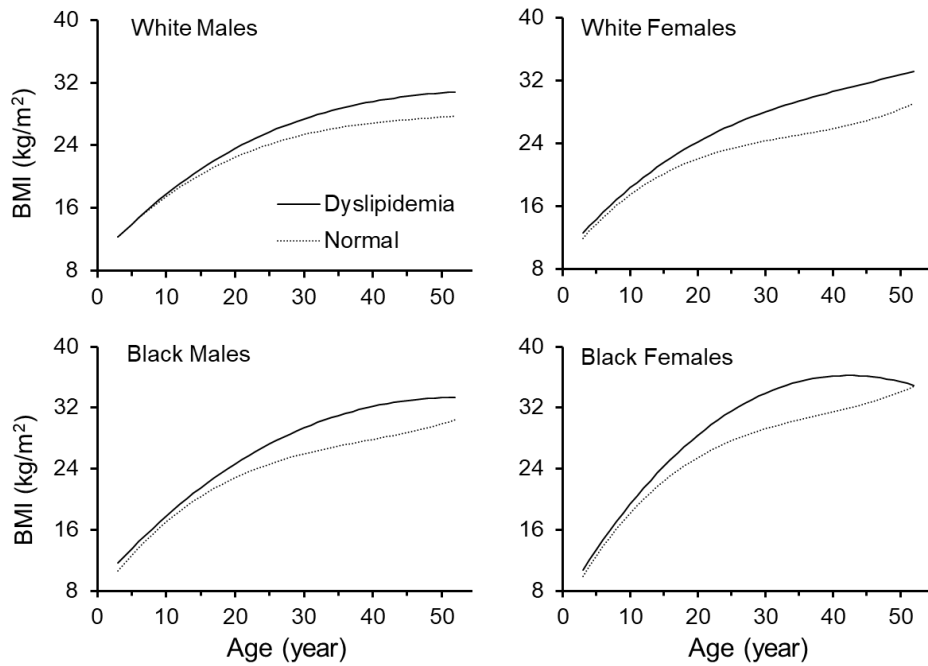

**Supplemental Figure 2.** Growth curves of body mass index (BMI) by adult dyslipidemia in race-sex groups

70

71

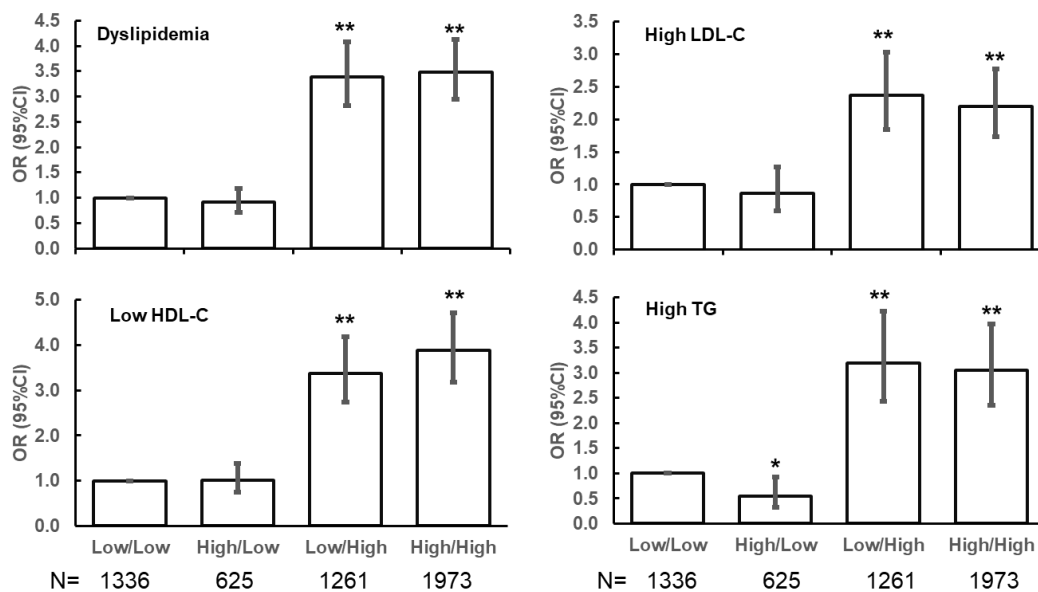

**Supplemental Figure 3.** The Odds ratios of lipid disorders according to childhood and adulthood BMI status adjusting for race, sex, age and cohort

Low/Low, childhood low BMI and adult low BMI; High/Low, childhood high BMI and adult low BMI; Low/High, childhood low BMI and adult high BMI; High/High, childhood high BMI and adult high BMI.

High/low BMI in childhood was defined by its race-sex specific medians; high/low BMI in adulthood was defined by 25 kg/m<sup>2</sup>.

Compared with low/low group: \* P<0.01, \*\*P<0.001.

72
